1     Effects of siRNA silencing on the susceptibility of the  
2     fish cell line CHSE-214 to *Yersinia ruckeri*

3

4     **Running page head:** siRNA silencing vs *Y. ruckeri*

5

6     **Authors:** Simon Menanteau-Ledouble<sup>1#</sup>, Oskar Schachner<sup>1</sup>, Mark L.

7     **Lawrence<sup>2</sup>, Mansour El-Matbouli<sup>1</sup>**

8     <sup>1</sup> *Clinical Division of Fish Medicine, University of Veterinary Medicine, Vienna,*

9     *Austria*

10    <sup>2</sup> *College of Veterinary Medicine, Mississippi State University, Mississippi State,*

11    *Mississippi, USA*

12

13    **Postal addresses:** Clinical Division of Fish Medicine, University of Veterinary

14    Medicine, Veterinärplatz 1, 1210 Vienna, Austria

15        **# Corresponding Author:** Dr. Simon Menanteau-Ledouble

16        **Email Address:** [menanteaus@staff.vetmeduni.ac.at](mailto:menanteaus@staff.vetmeduni.ac.at)

17        **Tel. No.:** +431250775151

18        **Fax No.:** +431250775192

19

20    Additional email addresses:

21        M. El-Matbouli:           [mansour.el-matbouli@staff.vetmeduni.ac.at](mailto:mansour.el-matbouli@staff.vetmeduni.ac.at)

22        M. L. Lawrence:           [lawrence@cvm.msstate.edu](mailto:lawrence@cvm.msstate.edu)

23        O. Schachner :           [i107pc03@staff.vetmeduni.ac.at](mailto:i107pc03@staff.vetmeduni.ac.at)

24

## 25 **Abstract**

26 Bacterial pathogens are known to co-opt mechanisms of the host cells' physiology to  
27 gain intracellular entrance. Among the facultative intracellular bacteria is *Yersinia*  
28 *ruckeri*, an enterobacterium mostly known as the causative agent of enteric redmouth  
29 disease in salmonid fish. In the present study, we applied RNA inhibition to silence  
30 twenty pre-selected genes on the genome of a fish cell line (CHSE-214) followed by  
31 a gentamycin assay to quantify the effect of this silencing on the susceptibility of the  
32 cells to infection. It was found that silencing of 16 out of 20 genes significantly  
33 reduced the number of *Y. ruckeri* recovered at the end of the gentamycin assay.  
34 Among the genes with the strongest impact were Rab1A, actin and Rac1, which is  
35 consistent with our previous findings that N-acetylcysteine, a chemical inhibitor of  
36 Rac1, completely prevented invasion of cells by *Y. ruckeri*. Conversely, silencing of  
37 the Rho GTPase activating protein had no statistically significant effect, possibly  
38 because *Y. ruckeri*, like some other members of the *Yersinia* genus is able to activate  
39 Rho GTPase directly. Similarly, the effect of silencing E-cadherin was not statistically  
40 significant, suggesting that this might not be a target for the adhesion molecules of *Y.*  
41 *ruckeri*. Taken together, these findings improve our understanding of the infection  
42 process by *Y. ruckeri* and of the interactions between this bacterial pathogen and  
43 host cells.

44

## 45 **Importance**

46 Intracellular invasiveness is a mean for bacterial pathogen to gain shelter from the  
47 immune system as well as access nutrients. The enterobacterium *Y. ruckeri* is well

48 characterised as a facultative intracellular pathogen. However, the mechanisms of  
49 invasion scrutiny. Investigations have mostly focused on the bacterial virulence rather  
50 than on the host's mechanisms hijacked during invasion. The present findings  
51 therefore allow us to better understand the interaction between this important  
52 potentially zoonotic pathogen of fish and host cells in vitro.

53

## 54 **Keywords**

55 Bacterial invasion, Gentamycin assay, Rac1, Rab1A, Actin, *Oncorhynchus*

56 *tshawytscha*

57

## 58 **Introduction**

59 The enterobacterium *Yersinia ruckeri* is a major fish pathogen world-wide; and has  
60 mostly been studied has the causative agent of enteric red-mouth disease in  
61 salmonid fish (1, 2). It is associated with acute outbreaks, especially in younger fish,  
62 and causes septicaemia and haemorrhages leading to high levels of mortality in  
63 infected fish (1–3), especially at temperature between 18 and 20°C. The bacterium  
64 has zoonotic potential and has been associated with topical infections in humans (4).  
65 Like several other enterobacteriaceae including other members of the genus  
66 *Yersinia*, *Y. ruckeri* has demonstrated the ability to survive within macrophages (5) as  
67 well as invade non-professional phagocytic cells (6, 7). This likely allows the access  
68 to some restricted nutrients and protects it from the immune system, moreover it  
69 might play a role in the bacterium's crossing of epithelial membranes as known from  
70 other members of the genus *Yersinia* (8).

71 Two main mechanisms of entry have been described in bacteria, and both are  
72 present in *Enterobacteriaceae*. In the trigger mechanisms, effector proteins secreted  
73 through the type three and type four secretion system (T3SS and T4SS) interact with  
74 regulatory proteins, in particular members of the Rho family (RhoGTPases Rac,  
75 Cdc42 or RhoG) (9). This leads to a rearrangement of the cytoskeleton of the host  
76 cells resulting in the uptake of the bacterium (10, 11). Interestingly, while *Y. pestis* is  
77 known to harbour a T3SS and some of its effector proteins have been shown to  
78 target the cytoskeleton and actin filaments. However, these effectors seem to play a  
79 role in preventing phagocytosis by professional phagocytic cells rather than to  
80 promote intracellular invasion (12). However, the T3SS of *Y. ruckeri* actually belongs  
81 to the Ysa family of T3SS, a different family than the one present in *Y. pestis*. It could  
82 therefore play a different role in the virulence of *Y. ruckeri*. Indeed, Ysa is more  
83 homologous to the T3SS carried on the *Salmonella* pathogenicity island 1 (SPI-1) of  
84 *Salmonella enterica* (13, 14). Among the proteins carried on the SPI-1 is the  
85 chaperon Invasion protein B (InvB) and the SPI-1 is known to play a role in the  
86 intracellular invasion of *S. enterica* (15, 16) so the Ysa of *Y. ruckeri* could plausibly be  
87 involved in intracellular invasion of *Y. ruckeri*. However, our knowledge of the Ysa  
88 T3SS, and that of *Y. ruckeri* in particular is still incomplete (17) and no conclusion is  
89 currently possible.

90 The other most studied mechanism of entry is the zipper mechanism that is  
91 considered as the main mechanism of entry for bacteria belonging to the genus  
92 *Yersinia*. It is initiated by the binding of the bacteria to specific molecules on the cell  
93 membrane. For example, in *Y. pestis*, the attachment-invasion locus (*ail*) of *Yersinia*  
94 *pestis* is a 17.5 kDa outer membrane protein that plays multiple roles in virulence  
95 (18), including a minor role in binding to fibronectin (12, 19, 20). Similarly, the

96 Plasminogen activator (Pla) has been shown to have adhesive property for laminin  
97 (21) and likely moonlights as an adhesion factor. In *Y. pseudotuberculosis* and *Y.*  
98 *enterocolitica*, the membrane proteins invasin (Inv) and Yersinia adhesin A (YadA)  
99 interact with integrin receptors (22). Interactions of the bacteria with the cell surface  
100 receptors lead to the recruitment of more receptors, activation of Rac1 and  
101 cytoskeletal rearrangement culminating in the uptake of the bacterium (23).

102 An important feature of both invasion mechanisms is that they require active  
103 uptake of the bacterium by the cell and it is possible to prevent host cells from  
104 internalising the bacteria, for example by treating them with chemical blockers (24).  
105 This is for example the case for *Y. ruckeri* and several chemical blockers have been  
106 shown to prevent bacterial invasion (6, 7).

107 Beside chemical blockers, silencing of the genes involved with internalisation has  
108 also been shown to have inhibitory effects. For example, a screening was performed  
109 using 23300 dsRNA to silence over 95% of the annotated genes on the genome of  
110 drosophila. This allowed to identify 305 genes whose inhibition interfered with the  
111 ability of *Listeria monocytogenes* to invade cell cultures of drosophila SL2 cells and  
112 86 genes necessary for invasion by *Mycobacterium fortuitum* (25, 26) . Interestingly,  
113 a screening by Kumar *et al.* (27) on 18,174 genes from the genome of human  
114 macrophages identified no less than 270 molecules whose silencing affected the load  
115 of seven different field isolates of *Mycobacterium tuberculosis* within human  
116 macrophages (27). Among these, 74 proteins were involved in the intracellular  
117 survival of every isolate tested and over half of the genes identified played a role in  
118 the regulation of autophagy, suggesting that this process was central in controlling  
119 intracellular *M. tuberculosis*. Conversely, when Thornbrough *et al.* applied a  
120 gentamicin assay to investigate the effect of a siRNA library targeting approximately

121 22,000 genes, they found that a larger variety of genes were involved in the  
122 intracellular survival of *Salmonella enterica* serovar *Typhimurium* within the human  
123 epithelial cell line MCF-7 (28). Among the 252 genes whose silencing reduced the  
124 survival of *S. enterica Typhimurium* more significantly were SEC22A, Rab1B and  
125 VPS33B that were involved in vesicle trafficking as well as ATP6VOD1, an ATPase  
126 involved in vacuole acidification and the iron transporter FTHL17. Nonetheless, the  
127 authors noted a significant overlap between their findings and that reported by Kumar  
128 *et al.* for *M. tuberculosis* (27) suggesting that many of these targets are well  
129 conserved even between very evolutionary distant bacteria.

130 In the present study, we aimed to produce siRNA to silence 20 genes selected  
131 because they are commonly associated with the intracellular survival of bacteria. The  
132 fish cell line CHSE-214 was used and the effect of this silencing on the susceptibility  
133 of the cells to intracellular invasion by the facultative intracellular fish pathogen *Y.*  
134 *ruckeri* was investigated using a gentamicin assay.

135

## 136 **Results and Discussion**

137 **Several notable genes were found to be necessary for the intracellular**  
138 **invasion process:** Silencing of every one of these genes resulted in reduction of the  
139 number of bacteria recovered from Chinook Salmon Embryo (CHSE-214) cells at the  
140 end of the assay; however, this reduction was only statistically significant in 16 out of  
141 20 genes (Table 1).

142 Among the genes whose silencing had the strongest effect were the protein kinase  
143 C, a regulatory protein overseeing a large number of varied functions, including  
144 signal transduction as well as the expression of the cytoplasmic tyrosine kinase,  
145 Focal Adhesion Kinase (FAK) and actin rearrangement (29). Previously, protein

146 kinase C activity has shown an inverse correlation with the uptake of *L.*  
147 *monocytogenes* by J774, a cell line of murine macrophage, as well as a positive  
148 correlation with the escape of these bacteria from the macrophages endosomes (30).  
149 Enteropathogenic *Escherichia coli* is also known to recruit protein kinase C to the  
150 membrane of HeLa as well as the colon carcinoma cell line T84 (31) and more  
151 recently, it has been shown that protein kinase C recruitment in lipid rafts was  
152 induced by Enterohemorrhagic *E. coli* O157:H7. In the present study, silencing of the  
153 gene encoding for protein kinase C resulted in a strong decrease of the cell  
154 susceptibility to bacterial infection (P=0.000).

155 Another important gene was the Ras related protein Rab1A. The Rab family  
156 constitute a subset of the Ras superfamily of proteins which are small GTPase acting  
157 together as network involved in the regulation of vesicular transport (32). In humans,  
158 more than 60 members of the Rab family have been identified (32) and about 52 in  
159 the channel catfish (*Ictalurus punctatus*), although no census of Rab proteins has yet  
160 been conducted for salmonid fish (33). Rab1A specifically is required for the  
161 microtubule-based motility of murine endocytic vesicles (34) and silencing of Rab1b  
162 was shown to lead to a reduced growth of *S. enterica* Typhimurium within MCF-7  
163 cells (28).

164 Equilibrative nucleoside transporter 1 is a member of a well conserved family of  
165 transmembrane proteins and silencing of the corresponding gene was found in the  
166 present study to significantly decrease intracellular bacterial survival and  
167 multiplication (P = 0.000). Pathogenic intracellular bacteria are known to scavenge  
168 nucleotide from their environment and therefore, this difference could be explained by  
169 a reduction in the nutrients available to the bacterium (35).

170 Another molecule whose silencing had a significant effect on cell sensitivity to  
171 infection ( $P = 0.000$ ) was the precursor for integrin  $\beta$ -1. Integrins are trans-membrane  
172 receptors and their role in cell adhesion to the extra-cellular matrix is well known.  
173 Moreover, integrins  $\beta$ -1 have been well studied as target of the adhesin molecules of  
174 *Yersinia* sp., including *Y. pseudotuberculosis* (36) and *Y. enterocolitica* (37). As such,  
175 they play a central role in the use of the zipper mechanisms by these bacteria to gain  
176 intracellular entry. The finding that this target is also important for *Y. ruckeri* suggests  
177 that this bacterium might gain intracellular entry through the zipper mechanism  
178 targeting of integrin  $\beta$ , in a manner reminiscent of that of *Y. pseudotuberculosis* and  
179 *Y. enterocolitica*.

180 Similarly, silencing of the actin gene also had a very notable effect ( $P = 0.000$ ).  
181 Because actin is such a central component of the cytoskeleton and because of the  
182 critical role of the cytoskeleton in both the trigger and zipper mechanism (11), this  
183 finding was not unexpected.

184 Finally, another molecule of importance was Ras-related C3 botulinum toxin  
185 substrate 1 (Rac1). It is a member of the Rho family of GTPases and plays a central  
186 role regulating cytoskeleton rearrangement. It has previously been involved in  
187 intracellular invasion of the enterobacteriaceae *Salmonella typhimurium* (38, 39) and  
188 is targeted by the effector protein IpgB1 of *Shigella* (40). Among *Yersinia* spp., the  
189 picture is more complex as Rac1 is inactivated by the T3SS effector protein YopE  
190 expressed among others by *Y. pseudotuberculosis* (41) and *Y. enterocolitica* (42).  
191 Notably, this Rac1 suppressive activity is most likely to hinder phagocytosis mediated  
192 killing (43) while intracellular invasion with the zipper pathway relies on the CDC42-  
193 independent activation of Rac1 (44). Moreover; in a previous experiment, we



194 investigated the effect of multiple chemical and found out that the inhibitor of Rac1 N-  
195 acetylcysteine completely inhibited entrance of *Y. ruckeri* into CHSE-214 cells (6).

196 **Conversely, several genes were identified for which silencing did not result**  
197 **in a statistically significant decrease of the cells' sensitivity to infection.** Among  
198 these genes were the Rho GTPase-activating protein (P = 0.795). Rho GTPases act  
199 as regulator and facilitator for the activity of Rho-GTPase molecules such as Rac1  
200 and CDC42. Several virulence factors of enterobacteriaceae are known to activate  
201 Rho GTPase enzymes directly (45), bypassing RhoGTPase activating proteins in a  
202 manner consistent with the present findings. An example of such a protein is the  
203 cytolytic necrotising factor (CNFy) of *Y. pseudotuberculosis* (46). Interestingly, a  
204 segment of the *Y. ruckeri*'s genome is homologous to a section of the gene encoding  
205 for *Y. pseudotuberculosis*' CNFy but it is not currently known if this molecule is active  
206 in *Y. ruckeri*.

207 Another protein whose silencing did not result in a significant reduction of  
208 sensitivity to infection was E-cadherin (P = 0.722). E-cadherin acts as the receptor for  
209 Internalin used by *Listeria. monocytogenes* (47). However, members of the *Yersinia*  
210 genus tend to use different surface receptors such as integrins (22). If E-cadherin is  
211 not a target of *Y. ruckeri*'s adhesion molecules, then it would be expected that  
212 silencing of the corresponding gene would not result in any significant change  
213 susceptibility to intracellular invasion.

214 The next gene whose silencing had no significant effect on the bacterial invasion  
215 was the caspase I precursor (P = 0.962). Caspases take part in the cellular immune  
216 response and play an important role in regulating apoptosis (48). Caspase I is known  
217 to be inhibited by the YopJ effector molecule of *Y. pestis* (49).

218 Finally, the last gene whose silencing had no statistically significant effect was the  
219 cyclin D1. Cyclin D1 regulates cellular proliferation (50) and its expression is known  
220 to be affected by intracellular invasion of *Streptococcus pyogenes* (51). However,  
221 there is no evidence suggesting it might play a role in the intracellular invasion of  
222 Gram-negative bacteria. Moreover, cyclin D1 is most expressed during the G1 phase  
223 of the cell life cycle (50). As our cells were confluent at the time of the intracellular  
224 invasion procedure, it is expected that the expression of cyclin D1 was lowered even  
225 in the absence of RNA inhibition.

226 To summarise, we used RNAi to silence 20 selected genes on the genome of  
227 CHSE-214 cells. Silencing of 15 of these genes resulted in a significantly reduced  
228 susceptibility to invasion of *Y. ruckeri*. The results of this study contribute to our  
229 understanding of the invasion mechanisms in this important fish pathogen.

230

## 231 **Materials and methods**

232 **Gene selection and design of the siRNA sequences.** Twenty genes were  
233 selected based on literature and the fact that homologs of these genes have been  
234 implicated in the intracellular invasion of other bacterial pathogens. The selection  
235 included genes commonly involved in invasion by bacterial pathogens, including  
236 surface integrins as such molecules are often targeted by the invasin molecules  
237 expressed by other Yersiniaceae (52–54). Other genes were cytoskeletal molecules  
238 and genes involved in vacuolar trafficking and maturation (27, 28) as well as agents  
239 of the cytoskeletal apparatus as this plays a central part in the internalization of  
240 bacteria through both the zipper and trigger mechanisms (55). The selection also  
241 included genes and pathways shared by *L. monocytogenes*, *M. tuberculosis* as well  
242 as *S. typhimurium* (25–28). As these pathways were used by such diverse facultative

243 intracellular pathogens, they might also be involved in the intracellular invasion of *Y.*  
244 *ruckeri*. After selection of the genes, sequences for the siRNAs were designed by  
245 Ambion Life Technology using the Silencer Select siRNA design algorithm. For the  
246 genes for which no *Oncorhynchus tshawytscha* sequences were available,  
247 sequences from other members of the *Oncorhynchus* genomes were used instead.  
248 Upon reception, the siRNAs were resuspended to 20  $\mu$ M and stored at -20°C until  
249 use, according to the manufacturer's instruction.

250 **siRNA transfection was performed based on the manufacturer's guidelines.**

251 This study made use of CHSE-214 cells. The identity of this cell line derived from  
252 Chinook Salmon Embryo has been confirmed by PCR and sequencing and their  
253 suitability for gentamycin assay has been confirmed before (6). CHSE-214 cells were  
254 grown in 24 well plates at 20°C supplied with 1250  $\mu$ l Minimum Essential Medium  
255 (MEM-glutaMAX™, Gibco) containing 2% FBS, where they reached about 80%  
256 confluence one day after seeding.

257 On the day of the assay, 8  $\mu$ l of the siRNA solution was added to 400  $\mu$ l of Opti-  
258 MEM medium (Gibco). At the same time, 72  $\mu$ l of RNAiMax lipofectamine reagent  
259 (Sigma Aldrich) was diluted in 1200  $\mu$ l of Opti-MEM medium. The two solutions were  
260 mixed together and incubated 5 minutes at room temperature. Afterwards, the culture  
261 medium on top of two adjacent rows of the 24 wells (either rows 3 and 4 or 5 and 6; 8  
262 wells in total) was replaced with 50  $\mu$ l of the solution and, after 20 minutes, 450  $\mu$ l of  
263 fresh MEM-Glutamax medium was added.

264 In each plate, as negative control, cells from the 8 wells in column 1 and 2 were  
265 processed in the same manner but without the siRNA, serving.

266 The cells were then incubated at 20°C and due to the temperature lower than  
267 other cell lines commonly used for transfection, incubation time was extended to  
268 three days.

269 **Bacterial invasion assay.** The gentamycin assay was performed as previously  
270 described (6). Briefly, *Y. ruckeri* ATCC 29473 was cultivated overnight in brain heart  
271 infusion (BHI, Oxoid). Optical density of the culture was assessed by  
272 spectrophotometry and adjusted to an optical density of 0.5 at 600 nm. The bacteria  
273 were pelleted down by centrifugation at 3220 g and 20°C (in an Eppendorf Centrifuge  
274 5810 R) before being resuspended in 10 times the original volume of MEM-  
275 Glutamax. Then, the culture medium in the wells 1A-C, 3 A-C and 5 A-C was  
276 replaced by this bacterial solution (for clarity, the plate loading plan is illustrated on  
277 Fig. 1) and the bacteria were left to interact with the cells for five hours at room  
278 temperature. In the wells 1D, 3D and 5D, the medium was replaced by fresh MEM-  
279 glutamax without bacteria. After that time, the medium was removed, the cells were  
280 washed three times with PBS and a fresh volume of MEM-glutamax, supplemented  
281 with the antibiotic gentamycin (Sigma-Aldrich) at a concentration of 100 µg.ml<sup>-1</sup> was  
282 added to the wells. The antibiotic was left to act for four hours. Afterwards the cells  
283 were washed twice with PBS before replacing the medium supplemented with 1%  
284 Triton-X (Sigma-Aldrich). After 10 minutes of exposure to the detergent, the cells  
285 were triturated with a micropipette and serially diluted from 10<sup>-1</sup> to 10<sup>-4</sup> before being  
286 plated onto Brain heart infusion agar (BHIA, Oxoid). Each of the three wells  
287 represented a biological replicate and each dilution was plated in technical  
288 quadruplicates, meaning that 48 plates were inoculated for each siRNA. The agar  
289 plates were incubated at 22°C until clear colonies were visible and counted (generally  
290 after 48 hours). The corresponding average CFU per ml value was then calculated.

291 To minimise the effect of the variation between cell and bacterial culture, these  
292 values were always compared to that of the control CHSE-214 cells from the same  
293 plate (Fig 1).

294 **Controls.** For each siRNA, in the 24 well plate the cells of number 1D, 3D and 5D  
295 were left un-inoculated then lysed and plated to act as a negative control and detect  
296 any contamination of the reagents while the cells in 2D, 4D and 6D were exposed  
297 tested using a trypan blue assay. Briefly, the cells were washed three times in PBS,  
298 then 0.2% Trypan Blue (0.4% diluted 1:1 in PBS) was added. The cells were stained  
299 for 1 minutes prior to fixation with 4% formalin for 10 minutes Afterwards they were  
300 rinsed several times until any trace of blue dye had disappeared. The plates were  
301 kept at 4°C until quantification of the cells using an inverted microscope (Leica DM  
302 IRB). One hundred cells were counted and the number of blue stained cells among  
303 them was recorded. The procedure was repeated 4 more times for each culture unit  
304 to result in 5 percentage values for each siRNA. These were then compared to the  
305 survival of the control cells without siRNA to confirm that the silencing procedure did  
306 not have a toxic effect. In no instances did these numbers differ significantly from that  
307 of the control.

308 Finally, the cells in the wells 2A-C, 4A-C and 5A-C were lysed in buffer RLT  
309 (Qiagen). The cell solution/suspension? was homogenised using QIAshredder  
310 columns (Qiagen) and centrifugation at 145000 RPM for two minutes at room  
311 temperature using MiniSpin tabletop centrifuge (Eppendorf). Afterwards, the RNA  
312 were extracted using the Rneasy mini kit (Qiagen) according to the manufacturer's  
313 handbook. The RNA were immediately quantified using a Nanodrop machine  
314 (ThermoFisher) and cDNA were immediately synthesised using Iscrip kits (Bio-Rad)

315 according to the manufacturer's instructions in a C1000 Touch thermocycler (Bio-  
316 Rad). Resulting cDNAs were stored at 4°C until use.

317 **RTqPCRs.** The primer sequences used for confirmation of silencing are listed in  
318 Table 2. Primers for ubiquitin and elongation factor 1-alpha designed by Peña *et al.*  
319 (56) were used for the housekeeping reference genes, as these authors found them  
320 among the most suitable when working with CHSE-214.

321 Genomic DNA was extracted from CHSE-214 cells using the DNeasy kit (Qiagen)  
322 according to the manufacturer's instructions. End point PCR was performed using  
323 these primers to confirm the optimal annealing temperature, afterwards the PCR  
324 products were purified with a QIAquick gel purification kit (Qiagen). The products'  
325 concentration were measured using a nanodrop, then adjusted to 10 ng.µl<sup>-1</sup>.  
326 Afterwards, serial dilution was performed to produce concentrations ranging from 10<sup>-1</sup>  
327 to 10<sup>-4</sup> ng.µl<sup>-1</sup>. qPCRs were then performed on these serial dilutions as well as the  
328 cDNA produced as described in the previous section. Relative gene expression  
329 levels of the silenced genes were calculated using the 2<sup>-ΔΔCt</sup> method (57) to confirm  
330 the efficacy of the silencing. The serial dilutions were used to calculate the R<sup>2</sup> and  
331 efficiency of the qPCRs and confirm that these were above 0.9 and between 95 and  
332 100% respectively for every qPCR.

333

## 334 **Acknowledgments**

335 This research was financed by the Austrian Science Funds (Fonds zur Förderung der  
336 wissenschaftlichen Forschung), project P28837-B22. This funding body played no  
337 role in the design of the study or interpretation of data.

338

## 339    **References**

- 340    1.    Kumar G, Menanteau-Ledouble S, Saleh M, El-Matbouli M. 2015. *Yersinia*  
341        *ruckeri*, the causative agent of enteric redmouth disease in fish. *Vet Res*  
342        46:103.
- 343    2.    Barnes AC. 2011. Enteric redmouth disease (ERM) (*Yersinia ruckeri*), p. 484–  
344        511. *In* Fish diseases and disorders. Volume 3: viral, bacterial and fungal  
345        infections. CABI, Wallingford.
- 346    3.    Roberts RJ. 2012. The Bacteriology of Teleosts, p. 339–382. *In* Roberts, RJ  
347        (ed.), Fish Pathology, 4th ed. Wiley-Blackwell, London.
- 348    4.    De Keukeleire S, De Bel A, Jansen Y, Janssens M, Wauters G, Piérard D.  
349        2014. *Yersinia ruckeri*, an unusual microorganism isolated from a human  
350        wound infection. *New microbes new Infect* 2:134–5.
- 351    5.    Ryckaert J, Bossier P, D'Herde K, Diez-Fraile A, Sorgeloos P, Haesebrouck F,  
352        Pasmans F. 2010. Persistence of *Yersinia ruckeri* in trout macrophages. *Fish*  
353        *Shellfish Immunol* 29:648–655.
- 354    6.    Menanteau-Ledouble S, Lawrence MLML, El-Matbouli M. 2018. Invasion and  
355        replication of *Yersinia ruckeri* in fish cell cultures. *BMC Vet Res* 14:81.
- 356    7.    Tobback E, Decostere A, Hermans K, Van den Broeck W, Haesebrouck F,  
357        Chiers K. 2010. In vitro markers for virulence in *Yersinia ruckeri*. *J Fish Dis*  
358        33:197–209.
- 359    8.    Reis RS dos DOS, Horn F. 2010. Enteropathogenic *Escherichia coli*,  
360        *Samonella*, *Shigella* and *Yersinia*: cellular aspects of host-bacteria interactions  
361        in enteric diseases. *Gut Pathog* 2:8.
- 362    9.    Chung CY, Lee S, Briscoe C, Ellsworth C, Firtel RA. 2000. Role of Rac in  
363        controlling the actin cytoskeleton and chemotaxis in motile cells. *Proc Natl*

- 364 Acad Sci U S A 97:5225–30.
- 365 10. O Cróinín T, Backert S. 2012. Host epithelial cell invasion by *Campylobacter*  
366 *jejuni*: trigger or zipper mechanism? Front Cell Infect Microbiol 2:25.
- 367 11. Cossart P, Sansonetti PJ. 2004. Bacterial Invasion: The Paradigms of  
368 Enteroinvasive Pathogens. Science (80- ) 304:242–248.
- 369 12. Ke Y, Chen Z, Yang R. 2013. *Yersinia pestis*: mechanisms of entry into and  
370 resistance to the host cell. Front Cell Infect Microbiol 3:106.
- 371 13. Liu T, Wang K-Y, Wang J, Chen D-F, Huang X-L, Ouyang P, Geng Y, He Y,  
372 Zhou Y, Min J. 2016. Genome Sequence of the Fish Pathogen *Yersinia ruckeri*  
373 SC09 Provides Insights into Niche Adaptation and Pathogenic Mechanism. Int  
374 J Mol Sci 17:557.
- 375 14. Wang K, Liu T, Wang J, Chen D, Wu X, Jiang J, Liu J. 2015. Complete  
376 Genome Sequence of the Fish Pathogen *Yersinia ruckeri* Strain SC09, Isolated  
377 from Diseased *Ictalurus punctatus* in China. Genome Announc 3:e01327-14.
- 378 15. Bronstein PA, Miao EA, Miller SI. 2000. InvB Is a Type III Secretion Chaperone  
379 Specific for SspA. J Bacteriol 182:6638–6644.
- 380 16. Ehrbar K, Friebel A, Miller SI, Hardt W-D. 2003. Role of the *Salmonella*  
381 pathogenicity island 1 (SPI-1) protein InvB in type III secretion of SopE and  
382 SopE2, two *Salmonella* effector proteins encoded outside of SPI-1. J Bacteriol  
383 185:6950–67.
- 384 17. Guijarro JA, García-Torrico AI, Cascales D, Méndez J. 2018. The Infection  
385 Process of *Yersinia ruckeri*: Reviewing the Pieces of the Jigsaw Puzzle. Front  
386 Cell Infect Microbiol 8:1–10.
- 387 18. Kolodziejek AM, Hovde CJ, Minnich SA. 2012. *Yersinia pestis* Ail: multiple roles  
388 of a single protein. Front Cell Infect Microbiol 2:1–10.



- 389 19. Tsang TM, Felek S, Krukoni ES. 2010. Ail binding to fibronectin facilitates  
390 *Yersinia pestis* binding to host cells and Yop delivery. *Infect Immun* 78:3358–  
391 68.
- 392 20. Leo JC, Skurnik M. 2011. Adhesins of Human Pathogens from the Genus  
393 *Yersinia*, p. 1–15. *In* Linke, D, Goldman, A (eds.), *Bacterial Adhesion*. Springer  
394 Netherlands, Dordrecht.
- 395 21. Lobo LA. 2006. Adhesive properties of the purified plasminogen activator Pla of  
396 *Yersinia pestis*. *FEMS Microbiol Lett* 262:158–162.
- 397 22. Grassl GA, Bohn E, Müller Y, Bühler OT, Autenrieth IB. 2003. Interaction of  
398 *Yersinia enterocolitica* with epithelial cells: invasin beyond invasion. *Int J Med*  
399 *Microbiol* 293:41–54.
- 400 23. Ribet D, Cossart P. 2015. How bacterial pathogens colonize their hosts and  
401 invade deeper tissues. *Microbes Infect* 17:173–83.
- 402 24. Rox K, Rohde M, Chhatwal GS, Müller R. 2017. Disorazoles Block Group A  
403 Streptococcal Invasion into Epithelial Cells Via Interference with the Host  
404 Factor Ezrin. *Cell Chem Biol* 24:159–170.
- 405 25. Agaisse H, Burrack LS, Philips JA, Rubin EJ, Perrimon N, Higgins DE. 2005.  
406 Genome-Wide RNAi Screen for Host Factors Required for Intracellular  
407 Bacterial Infection. *Science* (80- ) 309:1248–1251.
- 408 26. Philips J a, Rubin EJ, Perrimon N. 2005. Drosophila RNAi screen reveals CD36  
409 family member required for mycobacterial infection. *Science* (80- ) 309:1251–3.
- 410 27. Kumar D, Nath L, Kamal MA, Varshney A, Jain A, Singh S, Rao KVS. 2010.  
411 Genome-wide analysis of the host intracellular network that regulates survival  
412 of *Mycobacterium tuberculosis*. *Cell* 140:731–43.
- 413 28. Thornbrough JM, Hundley T, Valdivia R, Worley MJ. 2012. Human Genome-

- 414 Wide RNAi Screen for Host Factors That Modulate Intracellular *Salmonella*  
415 Growth. PLoS One 7:e38097.
- 416 29. Sukumaran SK, Prasadarao N V. 2002. Regulation of Protein Kinase C in  
417 *Escherichia coli* K1 Invasion of Human Brain Microvascular Endothelial Cells. J  
418 Biol Chem 277:12253–12262.
- 419 30. Wadsworth SJ, Goldfine H. 2002. Mobilization of Protein Kinase C in  
420 Macrophages Induced by *Listeria monocytogenes* Affects Its Internalization  
421 and Escape from the Phagosome. Infect Immun 70:4650–4660.
- 422 31. Crane JK, Oh JS. 1997. Activation of host cell protein kinase C by  
423 enteropathogenic *Escherichia coli*. Infect Immun 65:3277–85.
- 424 32. Stenmark H. 2009. Rab GTPases as coordinators of vesicle traffic. Nat Rev  
425 Mol Cell Biol 10:513–25.
- 426 33. Wang R, Zhang Y, Liu S, Li C, Sun L, Bao L, Feng J, Liu Z. 2014. Analysis of  
427 52 Rab GTPases from channel catfish and their involvement in immune  
428 responses after bacterial infections. Dev Comp Immunol 45:21–34.
- 429 34. Mukhopadhyay A, Nieves E, Che F-Y, Wang J, Jin L, Murray JW, Gordon K,  
430 Angeletti RH, Wolkoff AW. 2011. Proteomic analysis of endocytic vesicles:  
431 Rab1a regulates motility of early endocytic vesicles. J Cell Sci 124:765–75.
- 432 35. Wheeler PR. 1990. Biosynthesis and scavenging of pyrimidines by pathogenic  
433 mycobacteria. J Gen Microbiol 136:189–201.
- 434 36. Leong JM, Fournier RS, Isberg RR. 1990. Identification of the integrin binding  
435 domain of the *Yersinia pseudotuberculosis* invasin protein. EMBO J 9:1979–89.
- 436 37. Wiedemann A, Linder S, Grassl G, Albert M, Autenrieth I, Aepfelbacher M.  
437 2001. *Yersinia enterocolitica* invasin triggers phagocytosis via beta1  
438 integrins, CDC42Hs and WASp in macrophages. Cell Microbiol 3:693–702.

- 439 38. Criss AK, Ahlgren DM, Jou TS, McCormick B a, Casanova JE. 2001. The  
440 GTPase Rac1 selectively regulates *Salmonella* invasion at the apical plasma  
441 membrane of polarized epithelial cells. *J Cell Sci* 114:1331–41.
- 442 39. Hardt WD, Chen LM, Schuebel KE, Bustelo XR, Galán JE. 1998. *S.*  
443 *typhimurium* encodes an activator of Rho GTPases that induces membrane  
444 ruffling and nuclear responses in host cells. *Cell* 93:815–26.
- 445 40. Ohya K, Handa Y, Ogawa M, Suzuki M, Sasakawa C. 2005. IpgB1 is a novel  
446 *Shigella* effector protein involved in bacterial invasion of host cells. Its activity to  
447 promote membrane ruffling via Rac1 and Cdc42 activation. *J Biol Chem*  
448 280:24022–34.
- 449 41. Aili M, Isaksson EL, Hallberg B, Wolf-Watz H, Rosqvist R. 2006. Functional  
450 analysis of the YopE GTPase-activating protein (GAP) activity of *Yersinia*  
451 *pseudotuberculosis*. *Cell Microbiol* 8:1020–1033.
- 452 42. Wölke S, Ackermann N, Heesemann J. 2011. The *Yersinia enterocolitica* type  
453 3 secretion system (T3SS) as toolbox for studying the cell biological effects of  
454 bacterial Rho GTPase modulating T3SS effector proteins. *Cell Microbiol*  
455 13:1339–57.
- 456 43. Zhang Y, Murtha J, Roberts MA, Siegel RM, Bliska JB. 2008. Type III Secretion  
457 Decreases Bacterial and Host Survival following Phagocytosis of *Yersinia*  
458 *pseudotuberculosis* by Macrophages. *Infect Immun* 76:4299–4310.
- 459 44. Wong K-W, Isberg RR. 2005. Emerging views on integrin signaling via Rac1  
460 during invasin-promoted bacterial uptake. *Curr Opin Microbiol* 8:4–9.
- 461 45. Lemonnier M, Landraud L, Lemichez E. 2007. Rho GTPase-activating bacterial  
462 toxins: from bacterial virulence regulation to eukaryotic cell biology. *FEMS*  
463 *Microbiol Rev* 31:515–534.

- 464 46. Lockman HA. 2002. *Yersinia pseudotuberculosis* Produces a Cytotoxic  
465 Necrotizing Factor. *Infect Immun* 70:2708–2714.
- 466 47. Bonazzi M, Lecuit M, Cossart P. 2009. *Listeria monocytogenes* Internalin and  
467 E-cadherin: From Bench to Bedside. *Cold Spring Harb Perspect Biol*  
468 1:a003087–a003087.
- 469 48. McIlwain DR, Berger T, Mak TW. 2015. Caspase functions in cell death and  
470 disease. *Cold Spring Harb Perspect Biol* 7:a008656–a008656.
- 471 49. Lilo S, Zheng Y, Bliska JB. 2008. Caspase-1 Activation in Macrophages  
472 Infected with *Yersinia pestis* KIM Requires the Type III Secretion System  
473 Effector YopJ. *Infect Immun* 76:3911–3923.
- 474 50. Stacey DW. 2003. Cyclin D1 serves as a cell cycle regulatory switch in actively  
475 proliferating cells. *Curr Opin Cell Biol* 15:158–63.
- 476 51. Wang B, Yurecko RS, Dedhar S, Cleary PP. 2006. Integrin-linked kinase is an  
477 essential link between integrins and uptake of bacterial pathogens by epithelial  
478 cells. *Cell Microbiol* 8:257–266.
- 479 52. Young VB, Falkow S, Schoolnik GK. 1992. The invasin protein of *Yersinia*  
480 *enterocolitica*: internalization of invasin-bearing bacteria by eukaryotic cells is  
481 associated with reorganization of the cytoskeleton. *J Cell Biol* 16:197–207.
- 482 53. Eitel J, Dersch P. 2002. The YadA Protein of *Yersinia pseudotuberculosis*  
483 Mediates High-Efficiency Uptake into Human Cells under Environmental  
484 Conditions in Which Invasin Is Repressed. *Infect Immun* 70:4880–4891.
- 485 54. Hudson KJ, Bliska JB, Bouton AH. 2005. Distinct mechanisms of integrin  
486 binding by *Yersinia pseudotuberculosis* adhesins determine the phagocytic  
487 response of host macrophages. *Cell Microbiol* 7:1474–1489.
- 488 55. Alonso A, Portillo FG Del. 2004. Hijacking of eukaryotic functions by

- 489 intracellular bacterial pathogens. *Int Microbiol* 7:181–191.
- 490 56. Peña AA, Bols NC, Marshall SH. 2010. An evaluation of potential reference  
491 genes for stability of expression in two salmonid cell lines after infection with  
492 either *Piscirickettsia salmonis* or IPNV. *BMC Res Notes* 3:101.
- 493 57. Livak KJ, Schmittgen TD. 2001. Analysis of relative gene expression data using  
494 real-time quantitative PCR and the 2(-Delta Delta C(T)) Method.  
495 *Methods* 2002/02/16. 25:402–408.
- 496
- 497

498

## 499 **Figure Legend**

500

501 **Fig 1** Loading plan for the 24 wells plates used in the gentamycin assay. Each siRNA  
502 was tested alongside a non-silenced control to minimise the variations between  
503 plates. For each gene silenced, the three first wells of the leftmost row were infected  
504 for the gentamycin assay while the bottom well was left uninfected as a control. On  
505 the rightmost row, RNA was extracted from the first three wells to confirm silencing  
506 by RTqPCR while the last well was stained using trypan blue to assess any toxic  
507 effect of the RNA silencing.

508

509

510 **Tables**

511

512 **Tables 1** Gene investigated in this study and effect of the silencing on the number of  
 513 bacteria recovered at the end of the gentamycin assay. Greyed out cells represent  
 514 genes whose silencing did not significantly impact the gentamycin assay.

| Gene name                                            | Function                                     | Significance |
|------------------------------------------------------|----------------------------------------------|--------------|
| <b>Protein kinase C</b>                              | Signal transduction                          | P = 0.000    |
| <b>Rab-1A</b>                                        | Vesicular trafficking                        | P = 0.000    |
| <b>SEC22b-B</b>                                      | Vesicular trafficking                        | P = 0.002    |
| <b>Vacuolar ATP synthase subunit A</b>               | Vacuolar protein sorting                     | P = 0.003    |
| <b>VPS-associated protein 33A</b>                    | Vacuolar acidification                       | P = 0.002    |
| <b>Rho1-GTPase</b>                                   | Cytoskeleton organisation                    | P = 0.006    |
| <b>Ubiquitin conjugating enzyme E2L3</b>             | Tagging of protein for ubiquitin degradation | P = 0.003    |
| <b>Sumo 2</b>                                        | Post-translational modification system       | P = 0.005    |
| <b>Equilibrative nucleoside transporter 1</b>        | Cellular uptake of nucleosides               | P = 0.000    |
| <b>Integrin <math>\beta</math>-1 precursor</b>       | Integrin                                     | P = 0.000    |
| <b>Actin</b>                                         | Cytoskeletal apparatus                       | P = 0.000    |
| <b>Rac1</b>                                          | Cell growth & cytoskeletal reorganization    | P = 0.000    |
| <b>SDC42</b>                                         | Rearrangement of actin filaments             | P = 0.001    |
| <b>Rho GTPase-activating prot.</b>                   | Rearrangement of actin filaments             | P = 0.795    |
| <b>Laminin</b>                                       | Structural scaffolding of the tissues        | P = 0.006    |
| <b>E-cadherin</b>                                    | Cell adhesion                                | P = 0.722    |
| <b>Myotubularin-related protein 2</b>                | Vesicular traffic and actin remodeling       | P = 0.045    |
| <b><i>p38b1 mitogen activated protein kinase</i></b> | Stress resistance and apoptosis              | P = 0.000    |
| <b>Caspase I precursor</b>                           | Role in apoptosis                            | P = 0.962    |
| <b>Cyclin D1</b>                                     | Coordination of mitosis                      | P = 0.948    |

515

516

517 **Tables 2** Primer sequences for the RTqPCR confirmation of the siRNA silencing. The

518 two first (greyed out) primer pairs are the housekeeping genes and were designed

519 by Peña *et al.* (56)

520

|                                               |                        |
|-----------------------------------------------|------------------------|
| Ubiquitin                                     | GGAAAACCATCACCCCTTGAG  |
|                                               | ATAATGCCTCCACGAAGACG   |
| Elongation Factor 1 alpha                     | GTCTACAAAATCGGCGGTAT   |
|                                               | CTTGACGGACACGTTCTTGA   |
| <b>Protein kinase C</b>                       | TTGTTTGGCGGACTCCTGAA   |
|                                               | CCACGCCGAAAACAATCTCC   |
| <b>Rab-1A</b>                                 | AACCCACCAACACCTCTAC    |
|                                               | GCACACACACACAACTTCTTTC |
| <b>SEC22b-B</b>                               | AGAGAGGAGAGGAGATAGGG   |
|                                               | TGGATAGAATGTGAGACCAGA  |
| <b>Vacuolar ATP synthase subunit A</b>        | CCGCTGAGGACTTCCGATAAAC |
|                                               | ACAGCCTTCCATAGCATTGCAC |
| <b>VPS-associated protein</b>                 | ATCCACAACCTGACTGCCTACC |
|                                               | CTCTCGCTGCTCTTGATGAAC  |
| <b>Rho1-GTPase</b>                            | TAGCCCCAGTTTGCTCTTCG   |
|                                               | GCTGTCTCGTTCACTGGTCA   |
| <b>Ube213</b>                                 | AACCCACCTCCTTTCTCTC    |
|                                               | TTCACTAAGTCCCCTTGTTCC  |
| <b>Sumo 2</b>                                 | TCCACCACAGAACCAATACC   |
|                                               | CAAAACAGGAAGGAAACAAAGG |
| <b>Equilibrative nucleoside transporter 1</b> | ACGTCCGTGTTAAATGCTC    |



|                                                |                        |
|------------------------------------------------|------------------------|
|                                                | ACAAAATCTCTCCTCCCCTC   |
| <b>Integrin <math>\beta</math>-1 precursor</b> | ACCAATCCTACCCCCTATCC   |
|                                                | AGACCTCCCTCATTGTGTCTG  |
| <b>Actin</b>                                   | CCAAGCAGGAATACGACGAG   |
|                                                | GCGTGGCAAAAAAAGTCCAG   |
| <b>Rac1</b>                                    | ACTCACCCCATTACCTACC    |
|                                                | CTGCTCCAATCTCTTTTGCC   |
| <b>SDC42</b>                                   | AGAGGGGAAGGAATCAACAG   |
|                                                | ATGACAGGCAGGTAGGAGAG   |
| <b>Rho GTPase-activating prot.</b>             | CAGAAGAAAATGAGCAAAGACC |
|                                                | CCTGAGAACTACTGTCCACC   |
| <b>Laminin</b>                                 | GCGAATCAGAACCCTCAAC    |
|                                                | GCAGATACACATCCCTCCAAC  |
| <b>E-cadherin</b>                              | TCCCTCAGTTCCTCAACTC    |
|                                                | TCTCAATCCTCTCCTCCTCC   |
| <b>Myotubularin-related protein 2</b>          | TCAAGCGGAATACAAAAGACAG |
|                                                | CCACTCTCTTCAACTCCTCATC |
| <b>MaPK</b>                                    | TTCACTTCTCAAACCCCAAAC  |
|                                                | CGCTCAAAGGACAAACCAC    |
| <b>Caspase I precursor</b>                     | GTGGAACAACAGGAAACAAAG  |
|                                                | TGATGGCAGTAGAACAGGG    |
| <b>Cyclin D1</b>                               | GCTGTCCTGTATGCTCTCTC   |
|                                                | CCCAAACCATTCCATTCTTCTC |

521

|   | 1                         | 2                       | 3                       | 4                     | 5                       | 6                     |
|---|---------------------------|-------------------------|-------------------------|-----------------------|-------------------------|-----------------------|
| A | No siRNA<br>Infected      | No siRNA<br>RNA isol.   | Gene 1<br>Infected      | Gene 1<br>RNA isol.   | Gene 2<br>Infected      | Gene 2<br>RNA isol.   |
| B | No siRNA<br>Infected      | No siRNA<br>RNA isol.   | Gene 1<br>Infected      | Gene 1<br>RNA isol.   | Gene 2<br>Infected      | Gene 2<br>RNA isol.   |
| C | No siRNA<br>Infected      | No siRNA<br>RNA isol.   | Gene 1<br>Infected      | Gene 1<br>RNA isol.   | Gene 2<br>Infected      | Gene 2<br>RNA isol.   |
| D | No siRNA<br>Mock infected | No siRNA<br>Trypan Blue | Gene 1<br>Mock infected | Gene 1<br>Trypan Blue | Gene 2<br>Mock infected | Gene 2<br>Trypan Blue |
